# Supplementary material for: ROW1 maintains quiescent centre identity by confining WOX5 expression to specific cells
Source: PubMed Central journal article supplement (PMC4316744; doi:10.1038/ncomms7003), 2015-01-29
Supplement: ncomms7003-s1.pdf [file ncomms7003-s1.pdf]

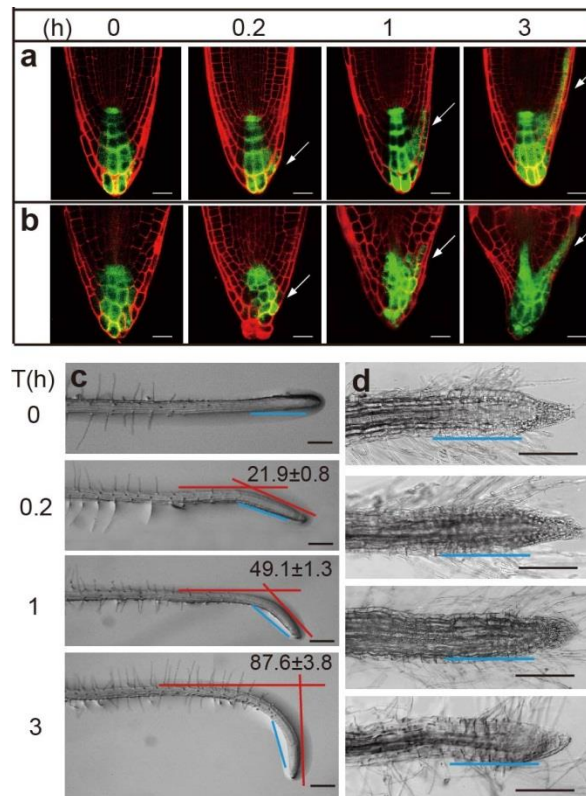

**Supplementary Figure 1. *row1-3* is defective in root gravitropic response but shows a normal asymmetrical redistribution of auxin. a**, Asymmetrical redistribution of DR5::GFP fluorescence signals in wild-type roots immediately after 0.2, 1 or 3 h of gravi-stimulation. **b**, Similar to wild type, the *row1-3* mutant showed DR5::GFP signal redistribution. **c**, Gravitropic responses in wild-type roots treated with 3 μM 1-naphthalene acetic acid (NAA), an auxin analogue, on the earthward side as indicated by the blue line. Bending angles (mean ± SE) were obtained from 10 seedlings. **d**, No gravitropic response was observed in *row1-3* roots after the same treatment. In **a** and **b**, bars = 20 μm; in **c** and **d**, bars = 100 μm.

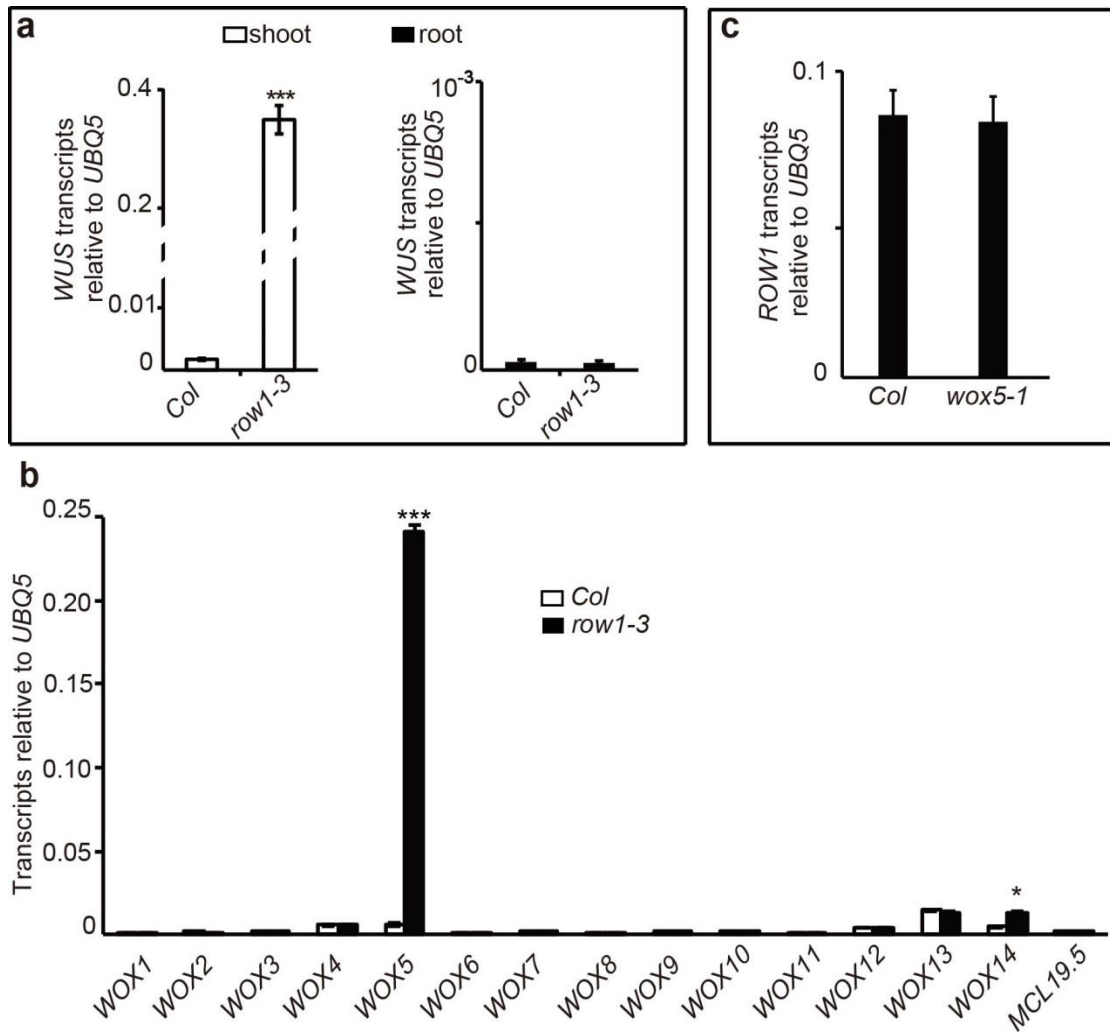

**Supplementary Figure 2. Identification of *WOX5* as a potential target of *ROW1* in *Arabidopsis* roots.** **a**, Comparisons of *WUS* mRNA levels in wild-type and *row1-3* by QRT-PCR. **b**, QRT-PCR analysis of *WOX* subfamily gene expression in the roots of *row1-3* as compared with expression in wild-type roots. **c**, Wild-type *Arabidopsis* (Col-0) and *wox5-1* roots contained similar amounts of *ROW1* mRNA as quantified by QRT-PCR. Relative transcript levels (mean  $\pm$  SE) were calculated from triplicate QRT-PCR experiments using independent RNA samples prepared from different batches of 7-d-old *Arabidopsis* seedlings. Constitutively expressed *UBQ5* was used as the internal standard for quantitative analysis. \* $P < 0.05$  compared with wild-type; \*\*\* $P < 0.001$  compared with the wild-type sample.

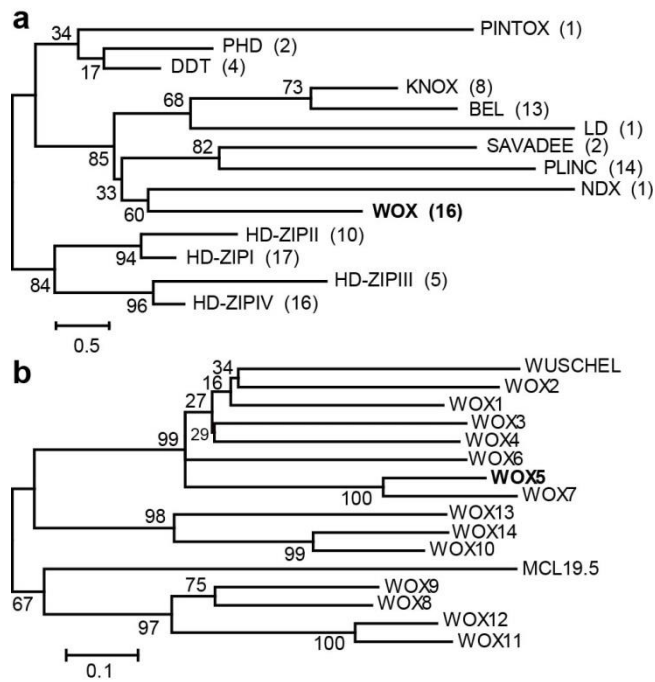

**Supplementary Figure 3. Phylogenetic analysis of the Arabidopsis homeobox transcription factor families and the WOX subfamily. a**, Phylogeny study of the homeobox transcription factor family by the neighbour-joining method using protein sequences for the analysis. Bootstrap values are shown on the branch points of the tree. The number of genes in each family is shown in parentheses. **b**, Detailed phylogeny study of the WOX subfamily.

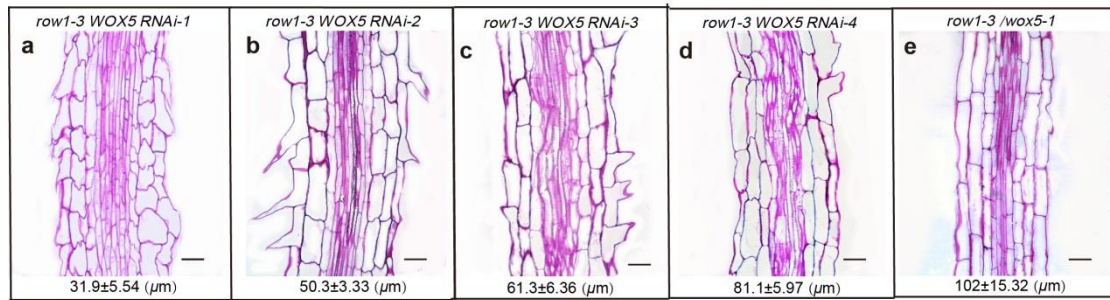

**Supplementary Figure 4. Comparisons of cell lengths in maturation zones of various genotypes. (a–e)** Median longitudinal semi-thin sections of 7-d-old *row1-3* WOX5 RNAi (**a–d**) lines and the *row1-3/wox5-1* double mutant (**e**) were stained with periodic acid–Schiff solution before being photographed. Measurements of cell lengths (mean ± SE) were obtained from 10 seedlings with two non-overlapping microscopic views from each. Bars = 20 μm in this figure.

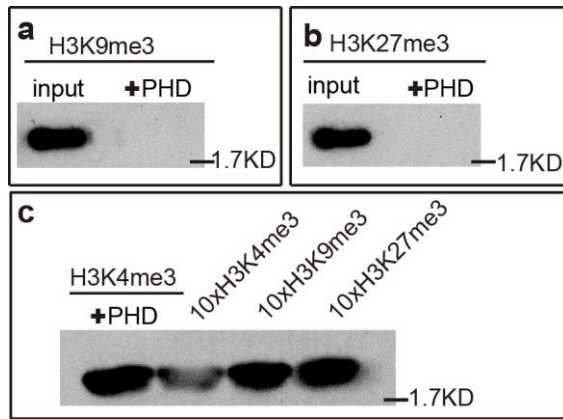

**Supplementary Figure 5. *In vitro*–expressed ROW1 PHD did not bind to H3K9me3 or H3K27me3, and H3K4me3 binding was competed only by unlabeled H3K4me3.** **a, b,** Binding to H3K9me3 (**a**) and H3K27me3 (**b**) was analysed. The input was 1  $\mu$ g of biotinylated commercial H3K9me3 or H3K27me3, respectively. +PHD, 10  $\mu$ g ROW1-PHD (67 aa from residues 388 to 454) was incubated in a HIS-tag column that contained the same amount of biotinylated H3K9me3 or H3K27me3, respectively. Bound peptides were detected by western blot using biotin antibodies as in Figure 3c. **c,** The binding between H3K4me3 and ROW1-PHD was successfully competed by 10  $\mu$ g (10 $\times$ ) unlabeled H3K4me3, whereas no visible reduction was observed in the lanes with 10  $\mu$ g (10 $\times$ ) unlabeled H3K9me3 or H3K27me3.

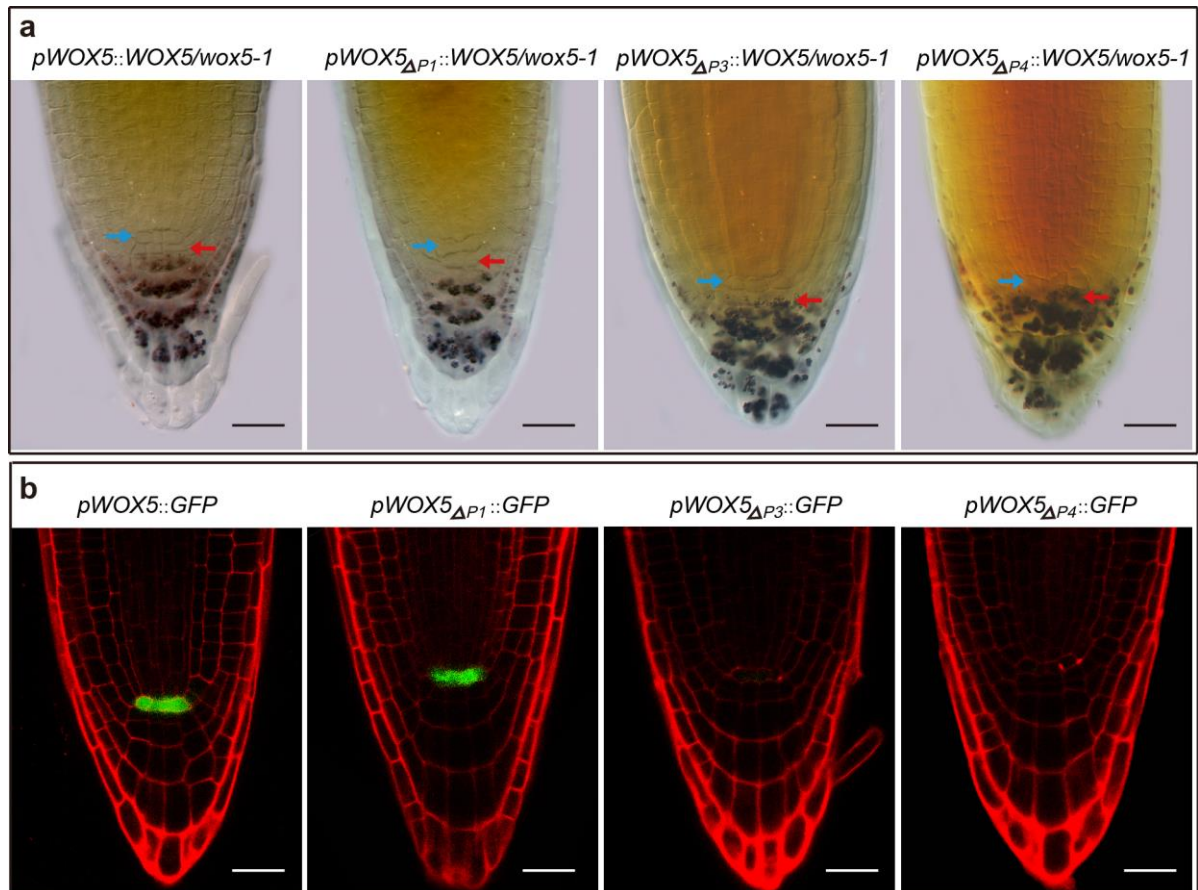

**Supplementary Figure 6. Promoter deletion analysis revealed the importance of P3 and P4 promoter fragments in regulating *WOX5* expression. a,** The *WOX5* promoter with its P3 or P4 fragment deleted lost the ability to restore the *wox5-1* root phenotype, whereas a full-length promoter or the promoter with P1 fragment deleted restored fully the *wox5-1* root phenotype. **b,** Deletion of P3 or P4 fragment resulted in a non-functional *WOX5* promoter with no GFP expression in wild-type background, whereas strong GFP signal is detected in plants carrying a full-length promoter or with the P1 fragment deleted. Bars = 20  $\mu$ m in this figure.

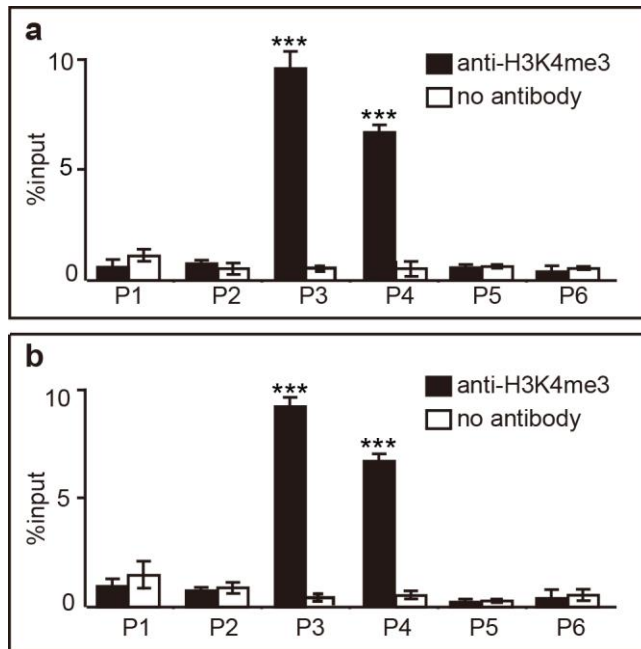

**Supplementary Figure 7. Levels of H3K4me3 in *row1-3* and *wox5-1* mutants were identical to those in wild type.** ChIP Q-PCR analysis of the same P3 and P4 *WOX5* promoter regions as reported in Figure 3e with antibodies against H3K4me3 using 7-d-old *row1-3* (**a**) and *wox5-1* (**b**) seedlings. Signal intensities were normalized relative to the input and were calculated from three independent ChIP Q-PCR experiments. Error bars represent SEs from three biological replicates. \*\*\*, denotes  $P < 0.001$ , compared to the negative control with no antibody added.

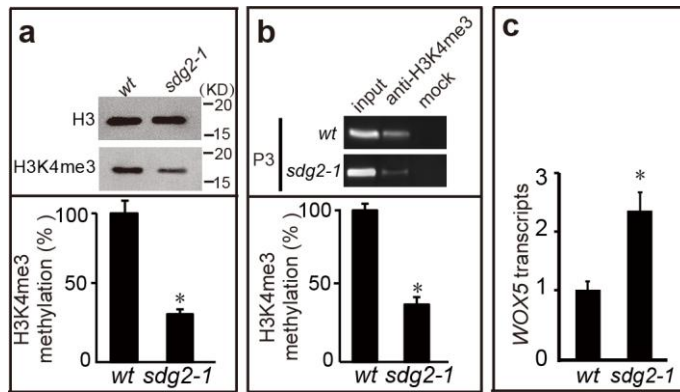

**Supplementary Figure 8. The reduced H3K4me3 level in *sdg2-1* correlated with a significant increase in *WOX5* transcription.** **a**, Western blotting analysis of H3K4 trimethylation showed a reduction in H3K4me3 levels in the *sdg2-1* mutant at the whole-genome level. H3 was used as the loading control. **b**, ChIP analysis of the P3 region using the same commercial antibodies against H3K4me3 as in Fig. 3e. The level of H3K4me3 at the *WOX5* promoter region was also significantly reduced in *sdg2-1* compared with that of the wild type. Statistical analyses obtained from three independent experiments are shown below a representative western blot in **a** and a representative ChIP assay in **b**. **c**, QRT-PCR analysis revealed that *WOX5* transcription was significantly upregulated in *sdg2-1*. The *WOX5* mRNA level in wild type root was arbitrarily set to 1. \* $P < 0.01$ . Statistics were obtained from three independent QRT-PCR experiments.



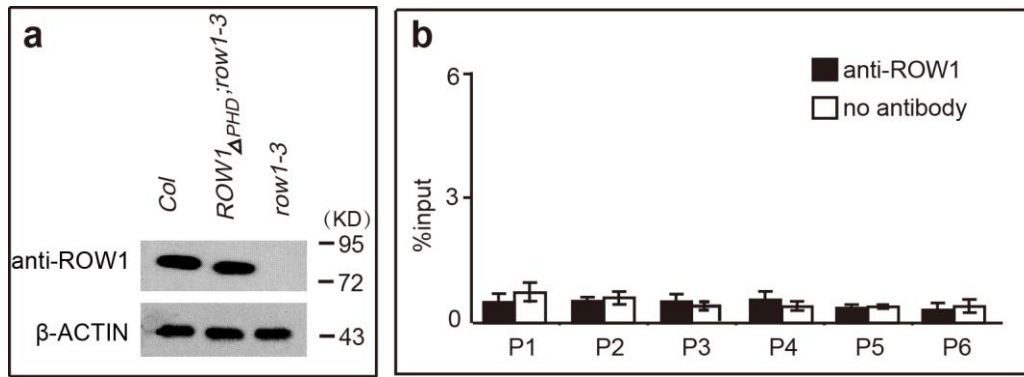

**Supplementary Figure 9. A deletion mutant of ROW1 that lacks the PHD domain failed in binding to P3 and P4 regions of the *WOX5* promoter. a**, Western blotting analysis of the stability of ROW1 protein lacking the PHD domain in *ROW1 $\Delta$ <sub>PHD</sub>;row1-3* seedlings. **b**, ChIP Q-PCR analysis of *WOX5* promoter regions as reported in Figure 3b with antibodies against ROW1 using 7-d-old *ROW1 $\Delta$ <sub>PHD</sub>;row1-3* seedlings.

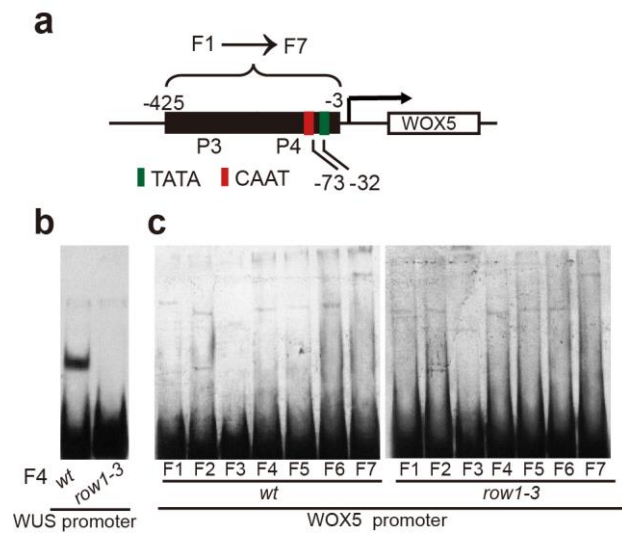

**Supplementary Figure 10. ROW1 may regulate *WOX5* and *WUS* expression by different mechanisms. a**, Schematic diagram showing the *WOX5* promoter region used for gel shift assays. Fragments: F1, -426 ~ 355; F2, -365 ~ -305; F3, -315 ~ -245; F4, -255 ~ -185 ; F5, -195 ~ -125; F6, -135 ~ -65; F7, -75 ~ -2 bp. **b**, ROW1 forms a specific protein-DNA complex on fragment 4 of the *WUS* promoter as previously reported<sup>24</sup>. **c**, Nuclear extracts prepared from wild-type plants can't form DNA-bound protein complex with the DNA fragments of the proximal *WOX5* promoter.

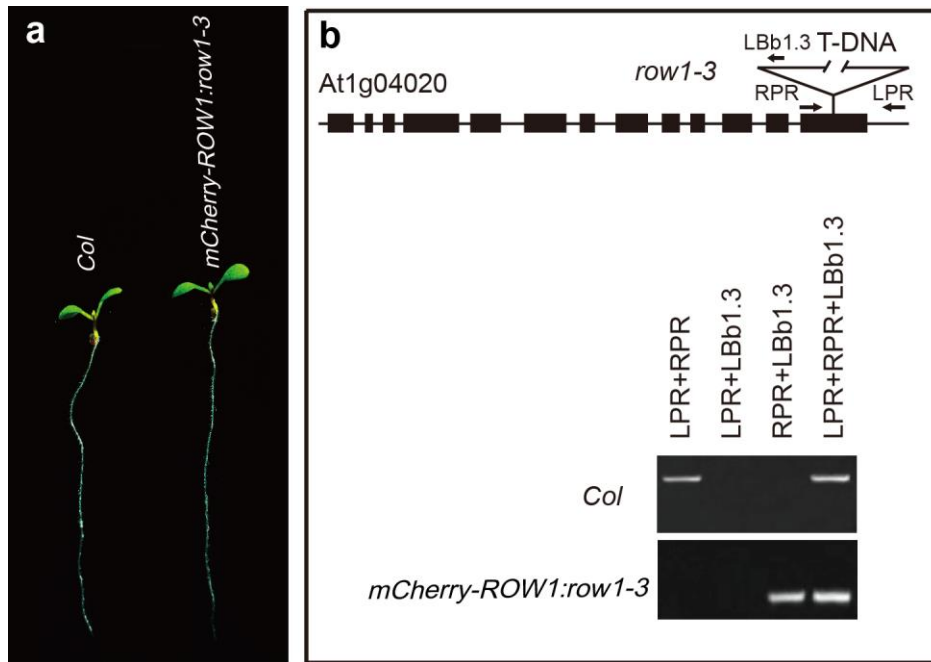

**Supplementary Figure 11. The mCherry-ROW1 fusion protein has biological function *in vivo*.** **a**, the mCherry-ROW1 construct is able to complement the *row1-3* phenotype. **b**, Genomic PCR analysis of homozygous *row1-3* mutant lines expressing the mCherry-ROW1 construct. RPR, complementary to the region downstream of the T-DNA; LPR, complementary to the region upstream of the T-DNA; LBb1.3, complementary to the left-most region of the T-DNA.

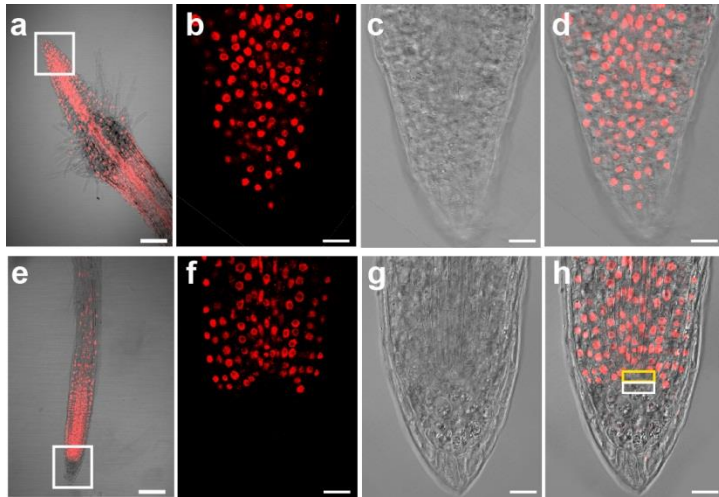

**Supplementary Figure 12. EdU incorporation in the root tips of various *Arabidopsis* lines.** Laser scanning confocal microscopy images of single optical sections of 4  $\mu\text{m}$  (optical depth) in the median plane of *row1-3* (**a–d**) and *wox5-1/row1-3* double mutant (**e–h**) root tips treated with 1  $\mu\text{M}$  EdU for 24 h in 1/2 MS medium. Differential interference contrast images were overlaid onto images of the red EdU signal. **a** and **e**, Low magnification, with scale bars = 100  $\mu\text{m}$ , to show the whole root structure. **b** and **f**, The same analysis as above with higher magnification (scale bars = 20  $\mu\text{m}$ ) to show EdU incorporation in the QC and other cell types. **c** and **g**, Differential interference contrast images. **d** and **h**, Laser scanning confocal microscopy images merged with differential interference contrast images to identify the possible QC position (yellow box) and the DSC layer (the white box below).

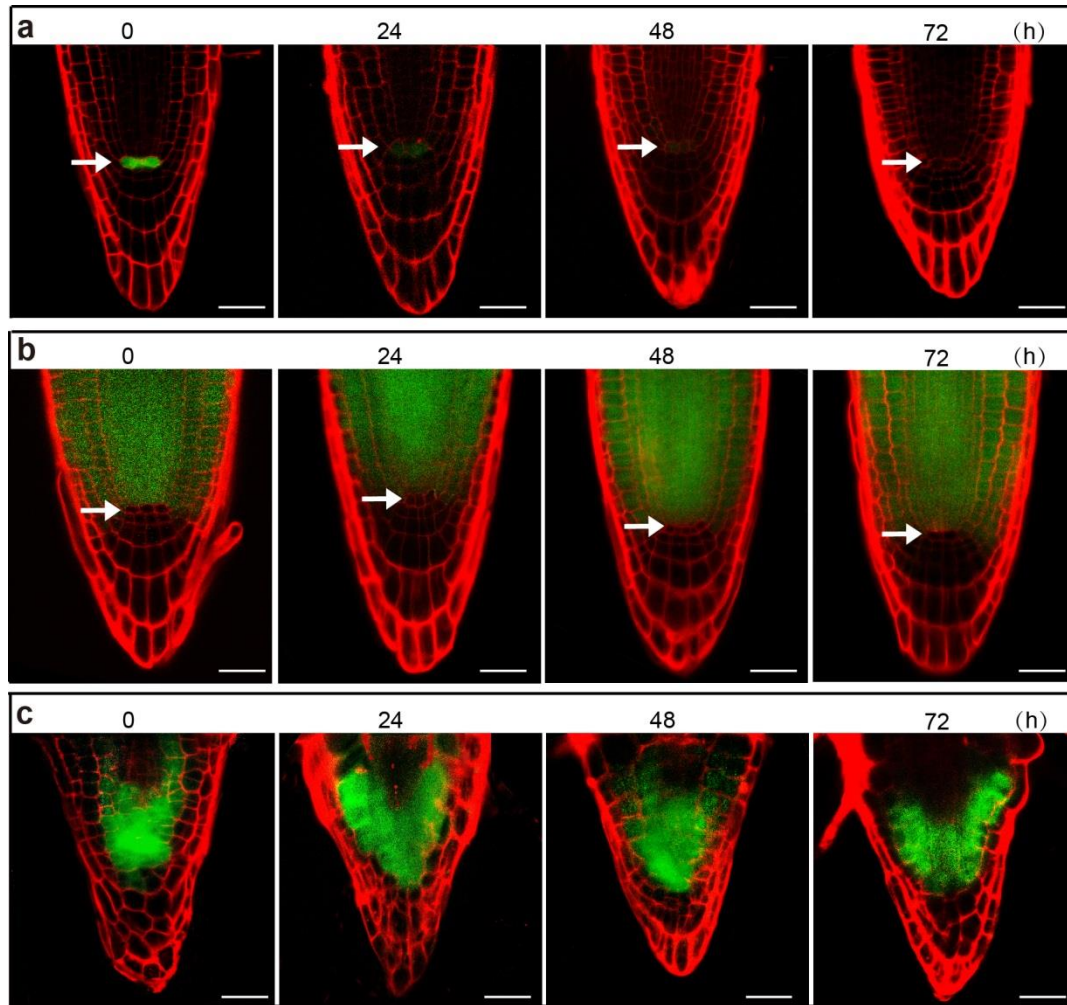

**Supplementary Figure 13. ROW1 repression of *WOX5* may be downstream of the auxin signalling pathway. a**, A gradual and substantial decrease in the *WOX5*::GFP signal in the QC after 24, 48 or 72 h of treatment with 5 μM NAA in wild type seedlings. **b**, *ROW*::GFP signal is not affected by the same 5 μM NAA treatment in wild type seedlings. **c**, No decrease in the *WOX5*::GFP signal intensity after the same period of NAA treatment in *row1-3* mutant seedlings. Scale bars = 20 μm.

**Supplementary Figure 14. Full gel and blot scans relating to indicated figures.**

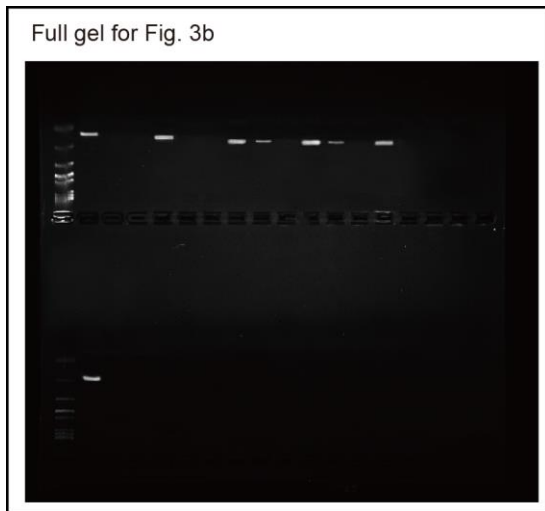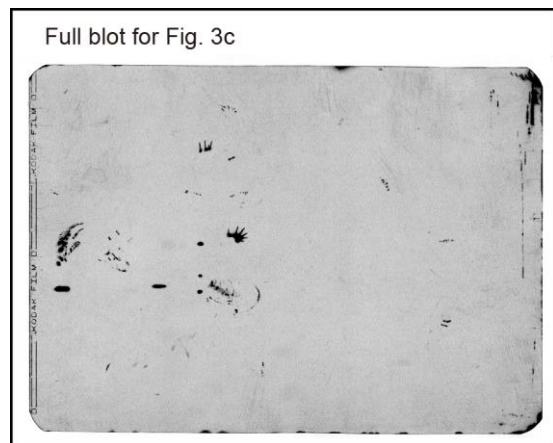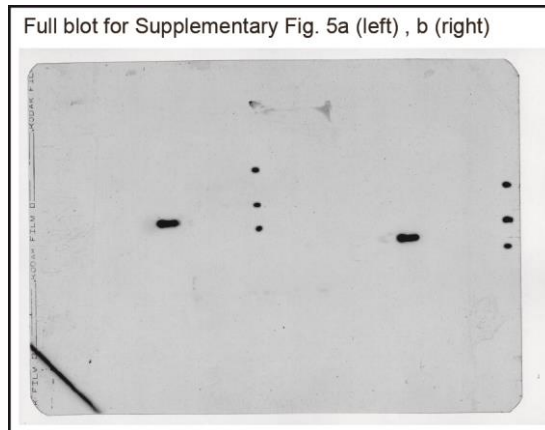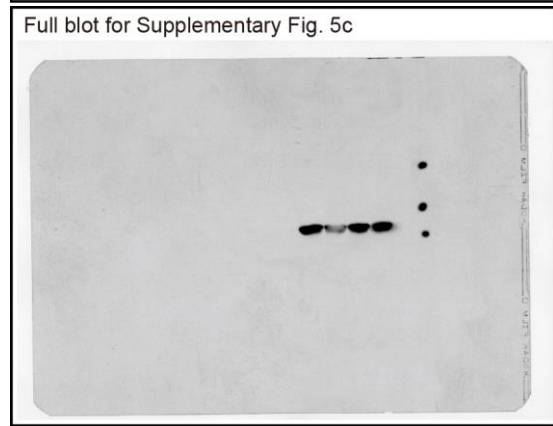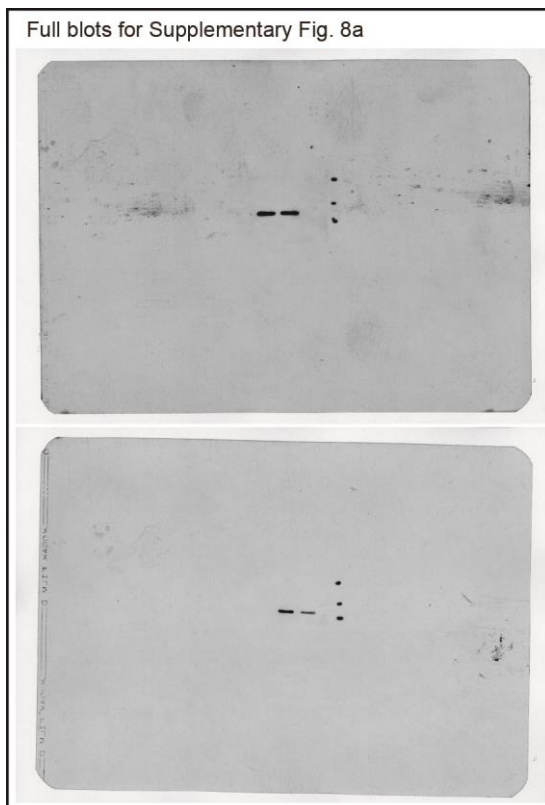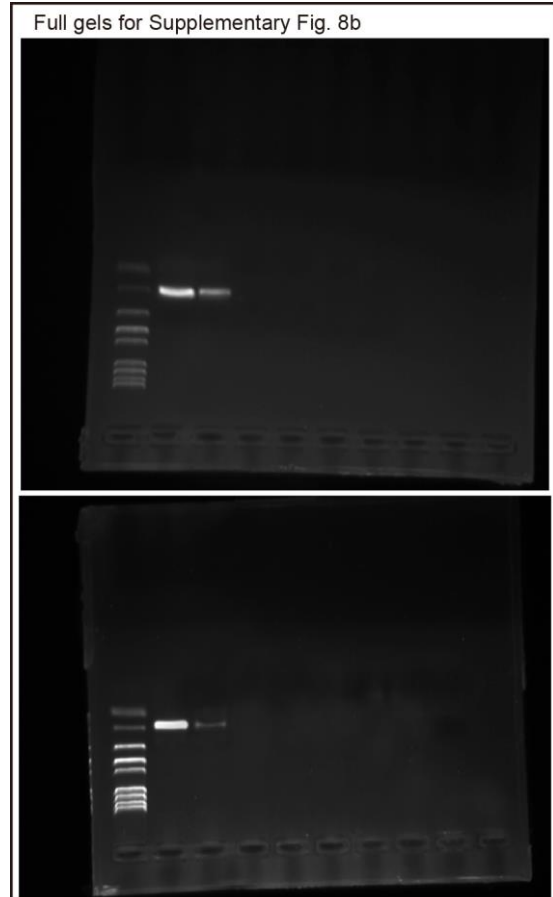

Full blots for Supplementary Fig. 9a

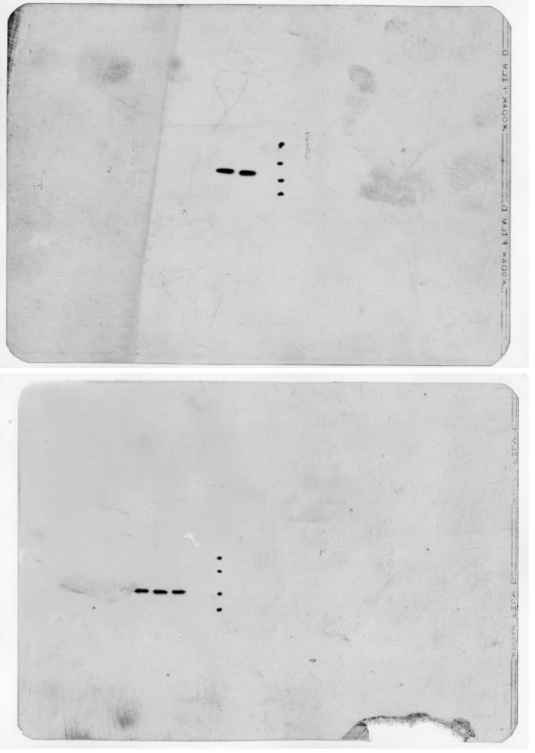

Full blot for Supplementary Fig. 10b

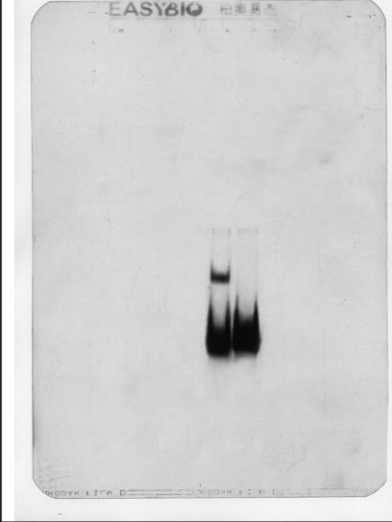

Full blot for Supplementary Fig. 10c

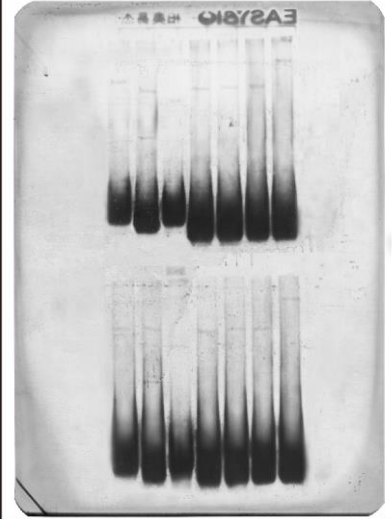

Full gels for Supplementary Fig. 11b

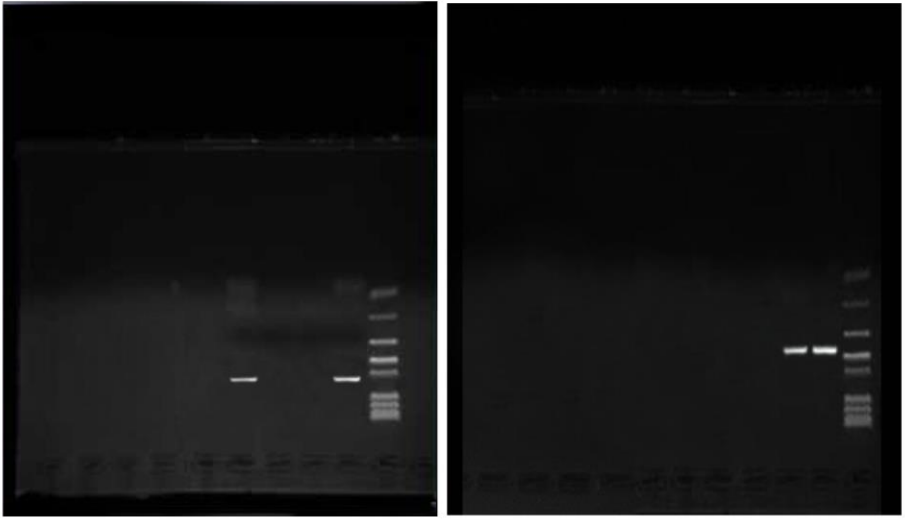

**Supplementary Table 1** Primers used for QRT-PCR and other analyses

| Gene             | Primer sequences                                                 | Product length (bp) |
|------------------|------------------------------------------------------------------|---------------------|
| QRT-PCR analysis |                                                                  |                     |
| <i>WUS</i>       | 5'-CGACGACGGAGCAAATCAAA-3'<br>5'-CATAGATCCATAGACATGGCT-3'        | 464                 |
| <i>WOX1</i>      | 5'-AACCACAAAGCCCGAGAACG-3'<br>5'-GCATCCGACCGAACATATCCAG-3'       | 168                 |
| <i>WOX2</i>      | 5'-GGCTTACTTCAATCGCCTCCTC-3'<br>5'-AGCCACCACTTGGAAATCATCAC-3'    | 185                 |
| <i>WOX3</i>      | 5'-TTTGATTGCTGCTCTCATCCTTC-3'<br>5'-TACGATGAGTTTGGACCCGTG-3'     | 158                 |
| <i>WOX4</i>      | 5'-ACGACCACTGGTGTCTTTAATCC-3'<br>5'-TCTCTATCTCCAAGTTCTCAAATCC-3' | 163                 |
| <i>WOX5</i>      | 5'-GTGGCAACAATAACGGAGG-3'<br>5'-TCTTGACAATCTTCTTCGCTT-3'         | 307                 |
| <i>WOX6</i>      | 5'-ACGACGGAACAGATCCAACAG-3'<br>5'-TTATGTGGTTTGATAATAGCACCAC-3'   | 152                 |
| <i>WOX7</i>      | 5'-AACACCGAGCACGGACCAG-3'<br>5'-CTTTCGCTGGTAGTTGATGACG-3'        | 218                 |
| <i>WOX8</i>      | 5'-TGGTAACGGAAGAAGGGATGG-3'<br>5'-TTAATAAACACCGTCATTCTCACC-3'    | 250                 |
| <i>WOX9</i>      | 5'-CTCTTGCCTTCTGCTTCTCACC-3'<br>5'-TCCGAATCTGCTCTGGCTTTG-3'      | 109                 |
| <i>WOX10</i>     | 5'-AGAACATTTACAAGGAAGGCAGTG-3'<br>5'-CCTAAATCAGGACTCGGGAACAG-3'  | 283                 |



|                |                                                                    |      |
|----------------|--------------------------------------------------------------------|------|
| <i>WOX11</i>   | 5'-TTATTTGGTGGGTCATCTCAAGTTC-3'<br>5'-AGGAACACCTGAGGAATGCACC-3'    | 396  |
| <i>WOX12</i>   | 5'-GTCGTCATCTCAAATCCCTTCC-3'<br>5'-AAACCAAACCTCATCAGTGGGAAG-3'     | 339  |
| <i>WOX13</i>   | 5'-ATAATGGGTTAGGGACAACAACAGC-3'<br>5'-CTTGTATTCAATCAGCCTGACATGC-3' | 214  |
| <i>WOX14</i>   | 5'-CGAAAGCAGCCTCAAACGAC-3'<br>5'-TCAATCCCTAAGTCAGGACTTGG-3'        | 143  |
| <i>MCL19.5</i> | 5'-GAACAAGAGGCGACATAGTGAA-3'<br>5'-TTTTCTTGGGTTTGTTCGGTGG-3'       | 112  |
| <i>UBQ5</i>    | 5'-GGTGCTAAGAAGAGGAAGAAT-3'<br>5'-CTCCTTCTTTCTGGTAAACGT-3'         | 237  |
| <i>ROW1</i>    | 5'-CCGCTAGGGTATCTGAGGC-3'<br>5'-CATAATCCCAACGGCATCT-3'             | 305  |
| T-DNA          |                                                                    |      |
| LPR and<br>RPR | 5'-TAGCTTCATCGGAATCTCTGC-3'<br>5'-CAAAAACCGCAAGACTCAGAG-3'         | 1098 |
| LPW and<br>RPW | 5'-ATCTCATAAACCATGCATCGG-3'<br>5'-TCGCTGGTTCCGATATAACAAC-3'        | 905  |
| LBb1.3         | 5'-ATTTTGCCGATTTCCGGAAC-3'                                         |      |
| ChIP Q-PCR     |                                                                    |      |
| <i>WOX5 P1</i> | 5'-ATATTATACATGTGTGTGGCGAACC-3'<br>5'-GTTGGTCGGCAAGTGTAGACAGG-3'   | 164  |
| <i>WOX5 P2</i> | 5'-CCTGTCTACTTGCCGACCAAC-3'<br>5'-GCAAGTCCTAAACAAAGATTGTATGC-3'    | 191  |
| <i>WOX5 P3</i> | 5'-GCATACAATCTTTGTTTAGGACTTGC-3'<br>5'-AGAATAATCAGAAAGCCTTGGTGG-3' | 232  |

|                            |                                                                                  |      |
|----------------------------|----------------------------------------------------------------------------------|------|
| <i>WOX5</i> P4             | 5'-TACCACCAAGGCTTTCTGATTATTC-3'<br>5'-CCTAACCTATCTAGGCTTCTGTTCC-3'               | 244  |
| <i>WOX5</i> P5             | 5'-GGATAAAGAAAACGATCAAATCTGC-3'<br>5'-CGTTTTAGGGCCTGTGTATATATCC-3'               | 234  |
| <i>WOX5</i> P6             | 5'-ATACACAGGCCCTAAAACGTAAAAC-3'<br>5'-AACTGAGCTCCGTAGAGATCTTCTG-3'               | 226  |
| <i>WOX5</i> UR             | 5'-ATGCTTTCCTTCGTAGTAGGCTC-3'<br>5'-TTCAGCAAAACCTGTCAACAGTG-3'                   | 196  |
| <i>WOX5</i> DR             | 5'-GATCGTTCACCCACTTGTCTTG-3'<br>5'-AAAATCAAGGCACCTGCGTAG-3'                      | 150  |
| Vector construction        |                                                                                  |      |
| <i>WOX5</i> RNAi           | 5'-GCGAAGAAGATTGTCAAGAGG-3'<br>5'-GACAACCTTTTTGATAAACCATGC-3'                    | 367  |
| <i>ROW1</i><br>promoter    | 5'-CCCAAGCTTCTCAGAAACAGGAAGGCCAAAC-3'<br>5'-AACTGCAGTGGTGATGTACAAAACCCAGATC-3'   | 1907 |
| <i>GFP</i>                 | 5'-TCCCCCGGGATGGTGAGCAAGGGCGAGGAGC-3'<br>5'-CGAGCTCTTACTTGTACAGCTCGTCCATG-3'     | 720  |
| <i>ROW1</i><br>genomic DNA | 5'-ACATGCATGCCAAAAGGAAAATCCAGTGAGTT-3'<br>5'-ACATGCATGCCAAAAGGAAAATCCAGTGAGTT-3' | 6054 |
| <i>WOX5</i><br>promoter    | 5'-AACTGCAGCGGTTTGTGTTGACGAAGAGTA-3'<br>5'-CCCCCGGGGTTTCAGATGTAAAGTCCTCAACTG-3'  | 4801 |
| <i>ROW1</i> cDNA           | 5'-CGGGGTACCATGGCGGAATTTACTAACATGC-3'<br>5'-GTCGACTTAGCCAATCACAGGATGTAACCTTG-3'  | 2145 |
| <i>mCherry</i>             | 5'-CCCCGGGATGGTGAGCAAGGGCGAGGAGGA-3'<br>5'-CGGGGTACCCTTGTACAGCTCGTCCATGC-3'      | 709  |
